# Supplementary material for: Insights into degradation mechanism of N-end rule substrates by p62/SQSTM1 autophagy adapter
Source: PubMed Central journal article supplement (PMC6098011; doi:10.1038/s41467-018-05825-x), 2018-08-17
Supplement: 41467_2018_5825_MOESM1_ESM.pdf [file 41467_2018_5825_MOESM1_ESM.pdf]

## **Supplementary Figures and Tables**

**Insights into degradation mechanism of N-end rule substrates by p62/SQSTM1  
autophagy adaptor**

D. H. Kwon *et al.*

**a**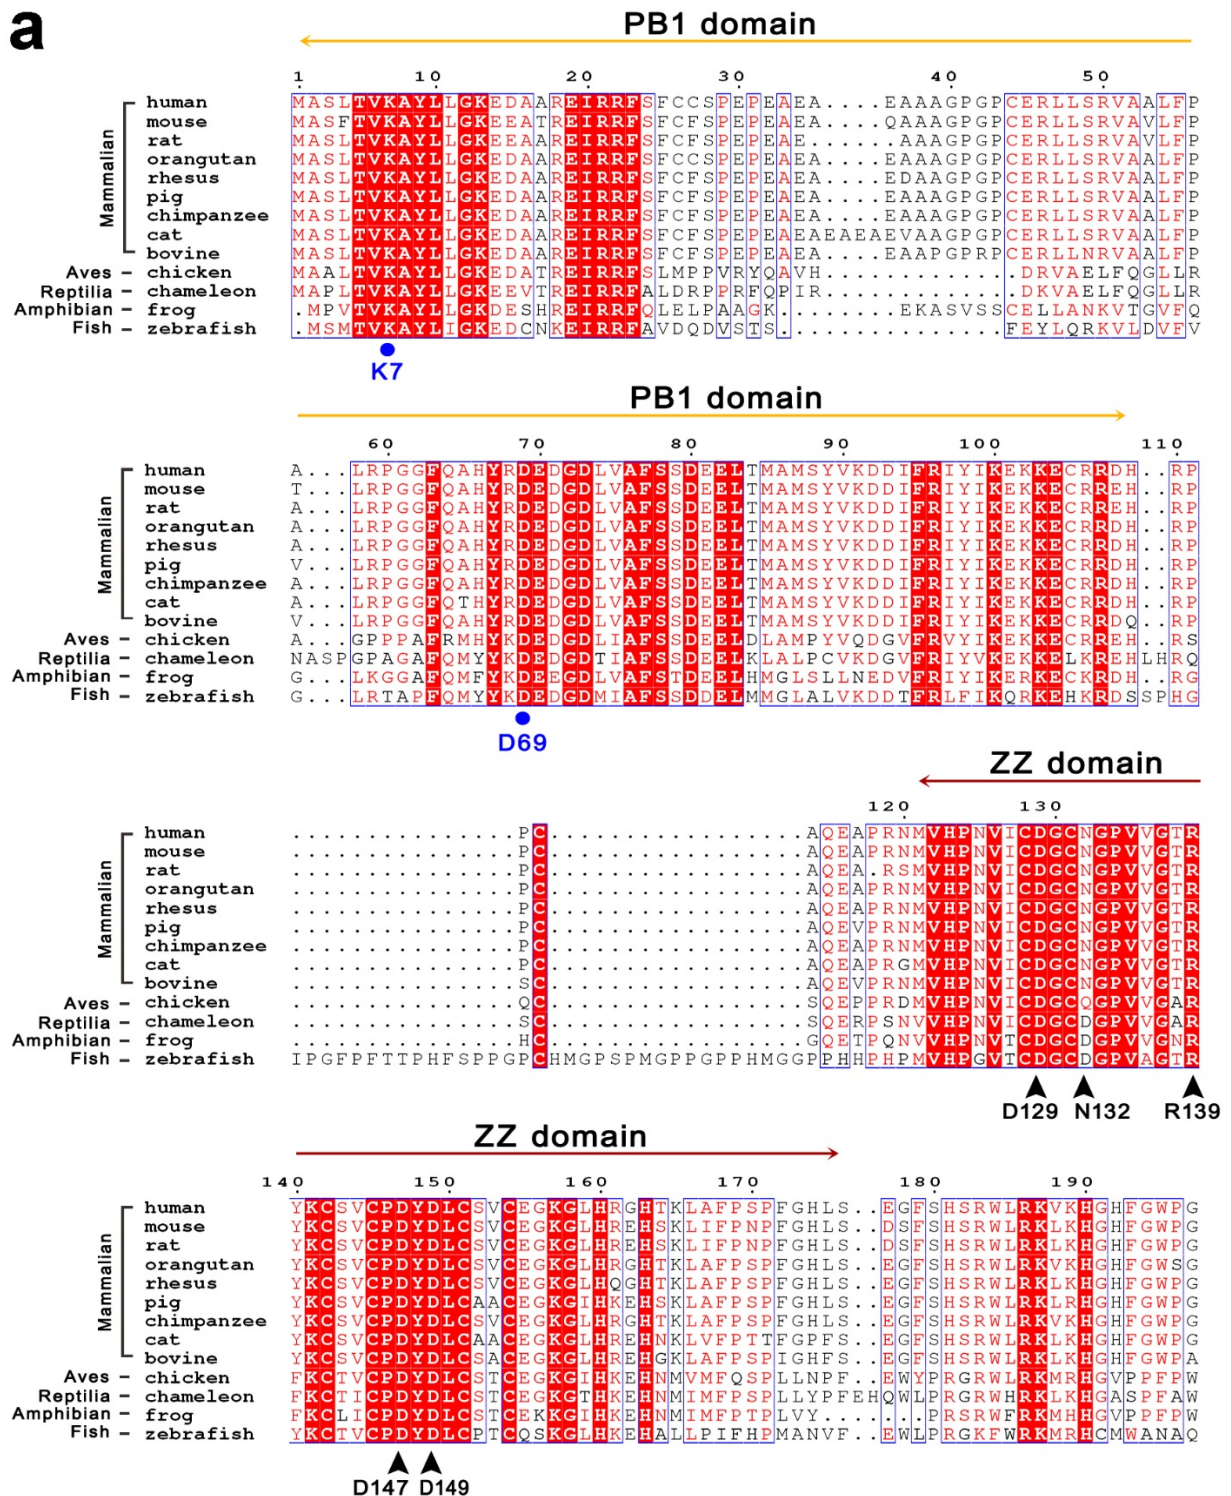**b**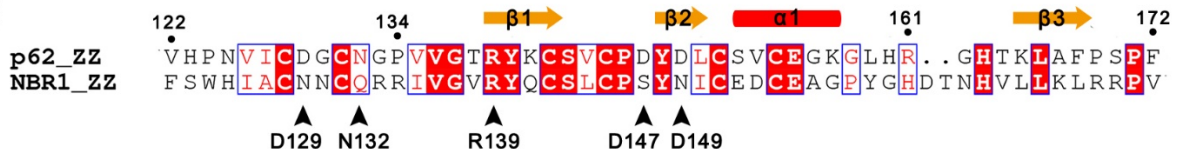

### **Supplementary Figure 1. Sequence alignment of p62**

(a) Sequence alignment of PB1 and the ZZ-domain of p62 orthologs. Organism sources are indicated on the left. The domain boundary of PB1 and ZZ is indicated above the sequence alignment. Every 10th residue of p62 from human (first row) is marked with a dot and the corresponding residue number. Mutated residues K7 and D69 utilized for disrupting oligomerization of p62 are marked by blue filled circle. (b) Sequence comparison of the ZZ-domain between p62 and NBR1 from human. Secondary structural elements ( $\alpha$ -helix as a red cylinder and  $\beta$ -strands as orange arrows) are shown above the sequence alignment. Key determinants for recognizing N-degrons are marked by black arrows. Red shading and blue boxes indicate residues that are identical and highly conserved in all sequences.

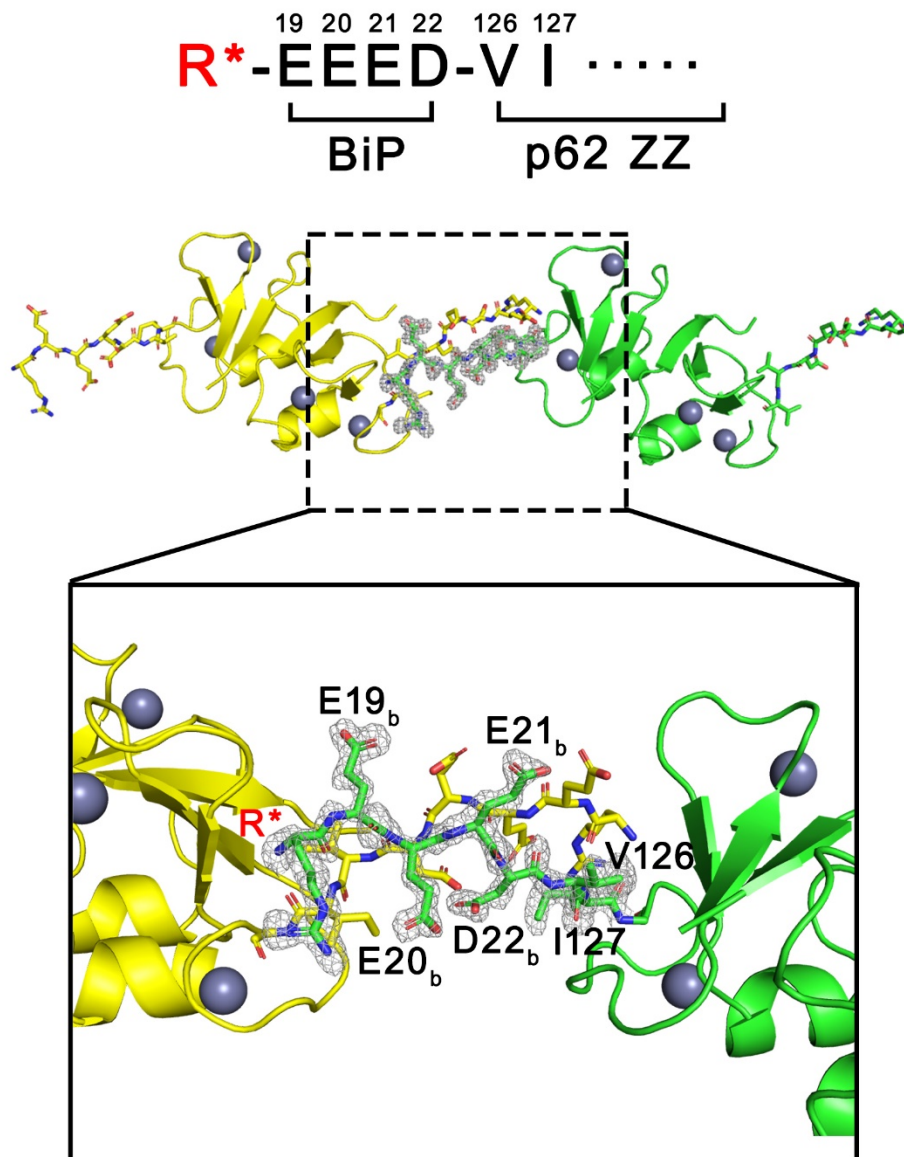

**Supplementary Figure 2. Binding of the N-degron sequence of an adjacent R-BiP-ZZ fusion protein to the recognition site of the ZZ-domain.**

For the N-degron bound structure, five R-BiP residues were covalently attached to the N-terminus of the ZZ-domain (residues Val126 to Phe172). Crystal packing showing the N-terminal residues of the green symmetry equivalent molecule bound to the active site of the yellow molecule. The dotted boxed region is enlarged and the 2Fo-Fc electron density map contoured at 1.2  $\sigma$  is shown with a stick model of the N-degron sequence.

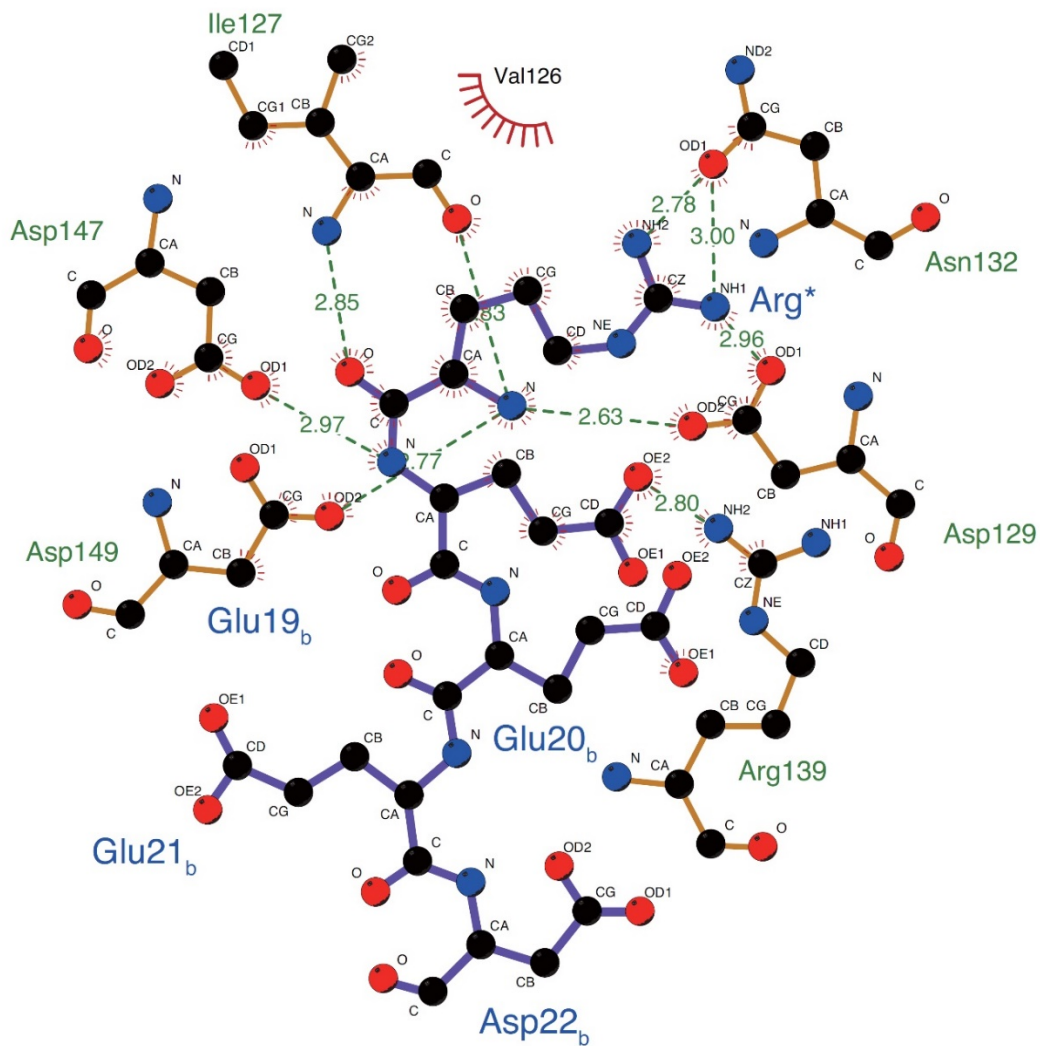

**Supplementary Figure 3. Schematic of interactions between the ZZ-domain and R-BiP N-degron**

Hydrophobic interactions are indicated with red starbursts, and hydrogen bonding interactions are shown as green dashed lines with hydrogen bonding distances. The ZZ-domain and N-degron residues are labeled green and blue, respectively. For R-BiP sequence, \* and subscript 'b' are attached for clarity.

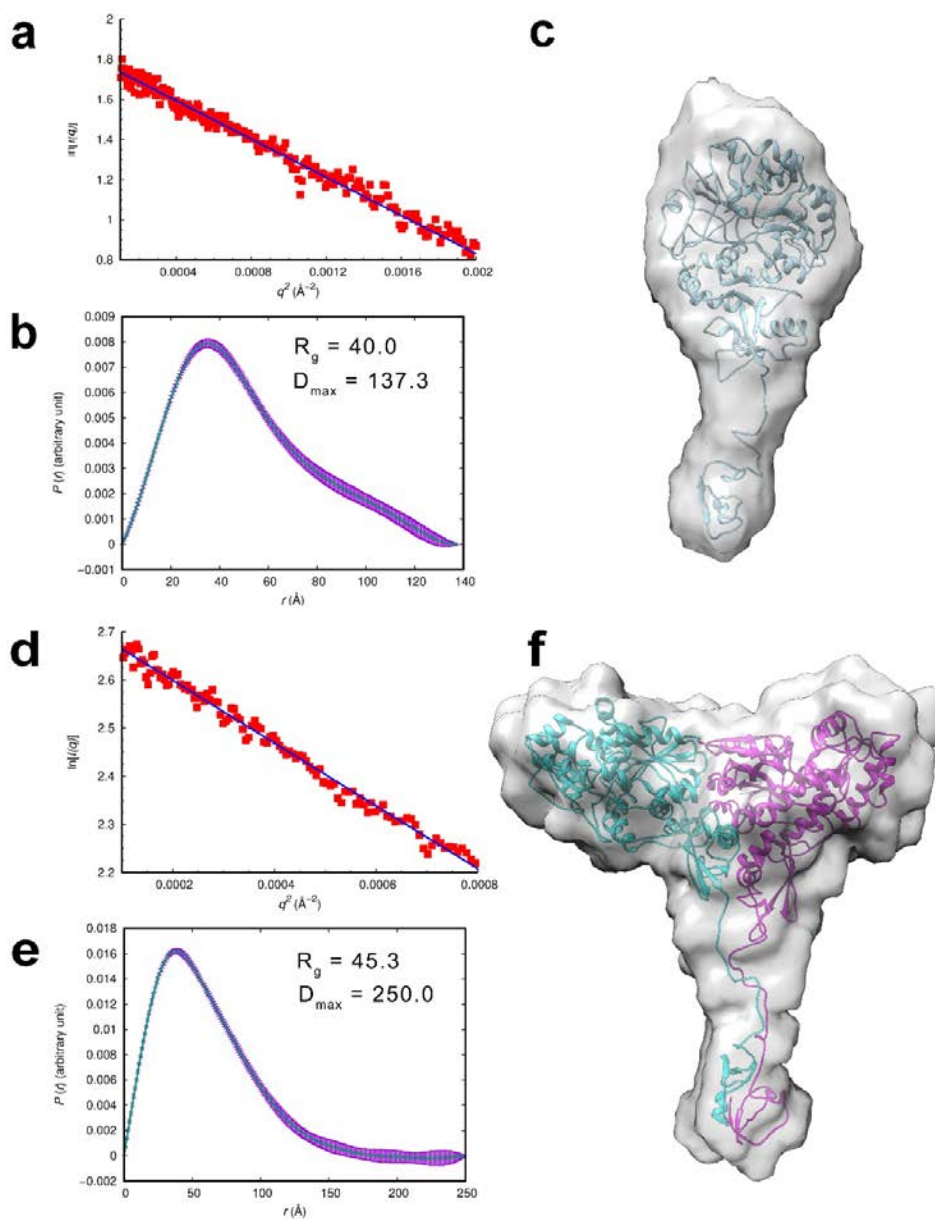

#### Supplementary Figure 4. Solution structures of MBP-PB1-ZZ D69A mutant

SAXS data analysis of monomeric (a-c) and dimeric (d-f) forms of MBP-PB1-ZZ mutant D69A. (a,d) SAXS experimental scattering curve (red) with theoretical curve (blue) fit by DAMMIF. (b,e) Pair distance distribution function,  $P(r)$  with error bar (violet) showing  $D_{\max}$  and  $R_g$  values. (c,f) Molecular envelope (gray) from DAMMIF with a fitted model (monomer: cyan, dimer: cyan and magenta) using the Molecular Dynamics Flexible Fitting method. The initial structure of MBP-PB1-ZZ was established by combining MBP (PDB ID: 5JST [<https://www.rcsb.org/structure/5JST>]), p62 PB1 (PDB ID: 4MJS [<https://www.rcsb.org/structure/4MJS>]), linker (modeled by Chimera) and the ZZ-domain (PDB ID: 5YP7) using Chimera (UCSF).

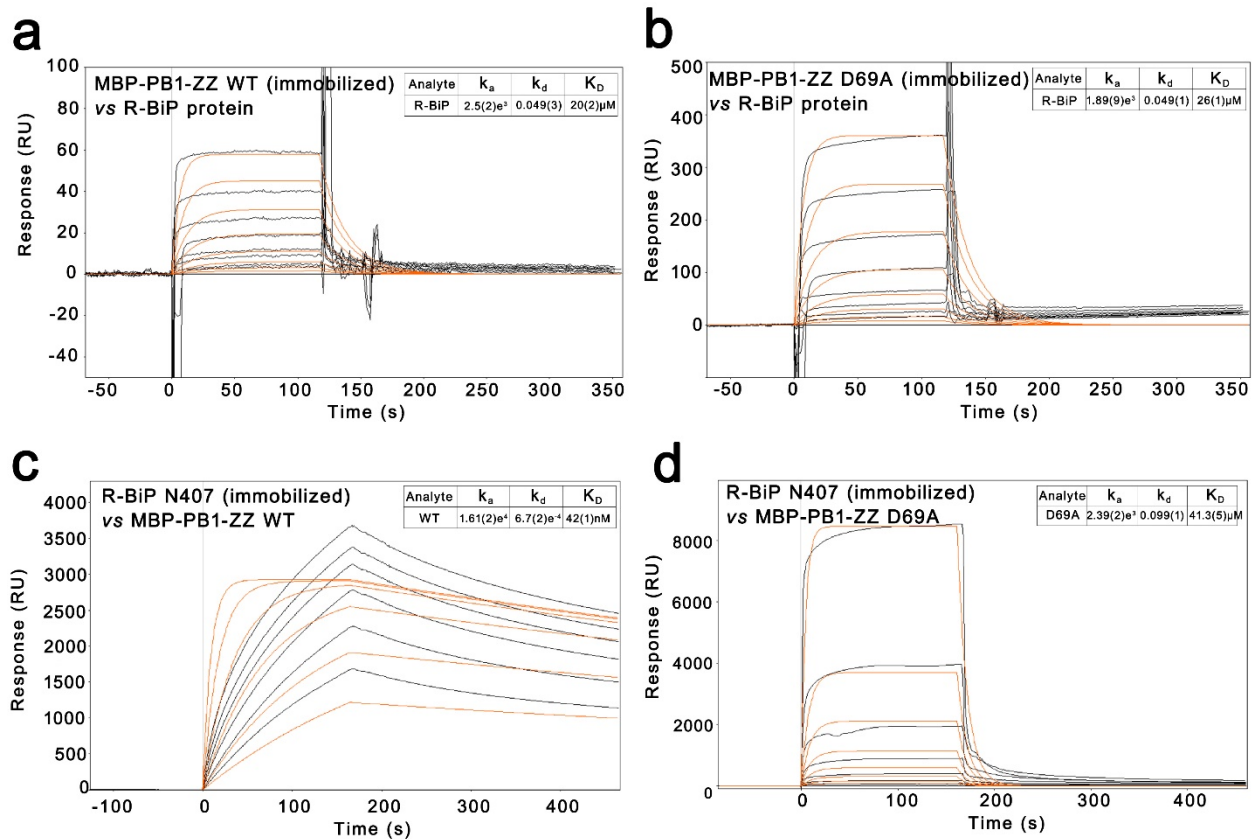

### Supplementary Figure 5. Binding affinity measurements between p62 and R-BiP protein using SPR

Surface plasmon resonance (SPR) sensorgram of R-BiP N407 protein (R\*-19~407 construct) binding to immobilized MBP-PB1-ZZ WT (**a**) and MBP-PB1-ZZ P69A mutant (**b**) on the CM5 chip. Conversely, the SPR sensorgram of the binding of p62 WT (**c**) and D69A mutant (**d**) to immobilized R-BiP protein on the CM5 chip. Response (RU, resonance unit) is plotted against time. The  $K_D$  was derived from at least 5 different concentrations of ligand.

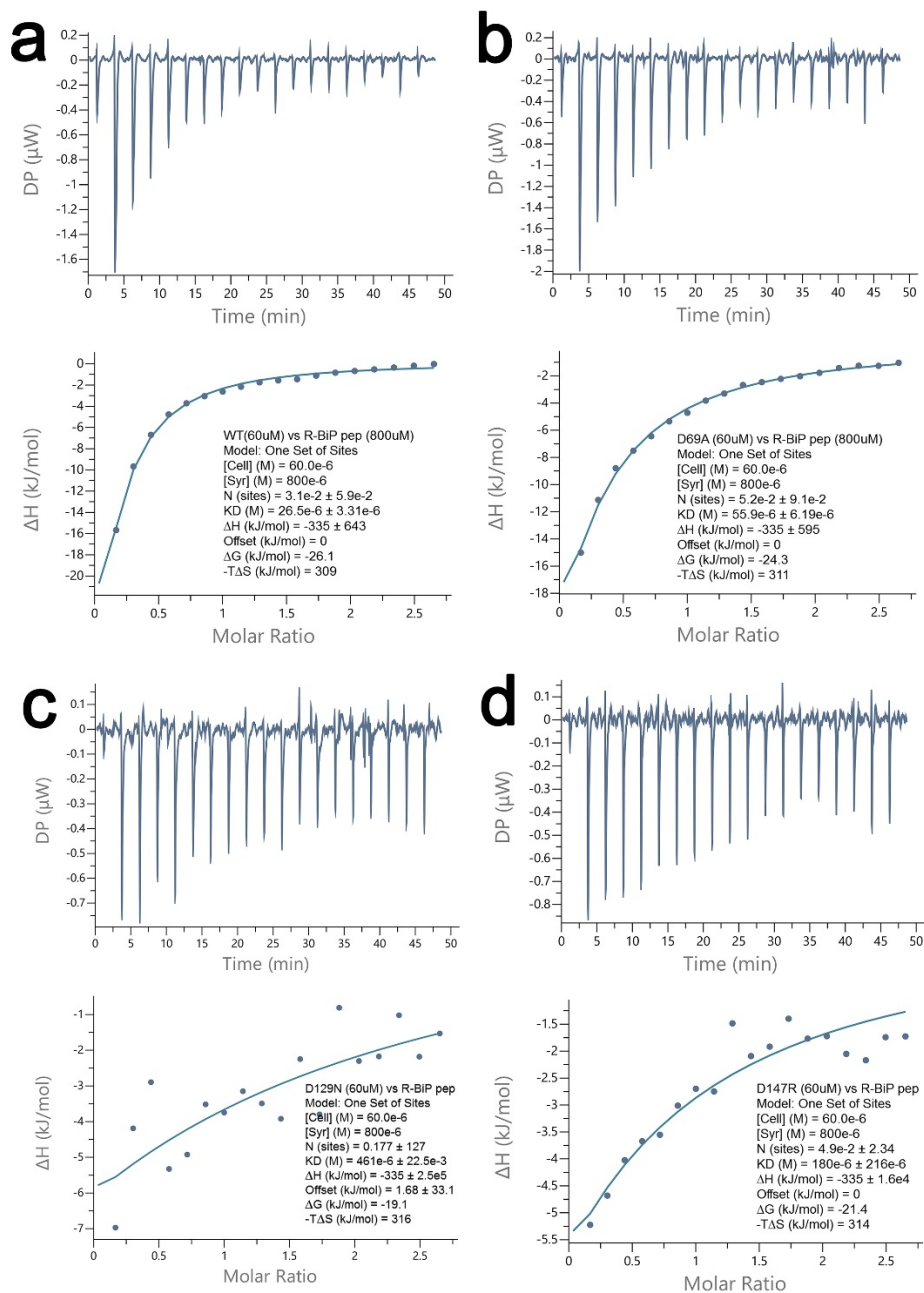

### Supplementary Figure 6. Binding affinity measurements between p62 and R-BiP peptide using ITC

Measurement of the affinities of p62 WT (a) and D69A mutant (b) to R-BiP peptide using ITC. The  $K_D$  values of the WT and D69A mutant with N-degron peptide were  $26.5 \pm 3.31 \mu\text{M}$  and  $55.9 \pm 6.19 \mu\text{M}$ , respectively, and showed unusual binding stoichiometry. ITC measurement of the binding of D129N (c) and D147R (d) mutants to N-degron peptide. The  $K_D$  values were much higher than those of WT and monomeric mutant, which confirms the binding defect of these mutants.



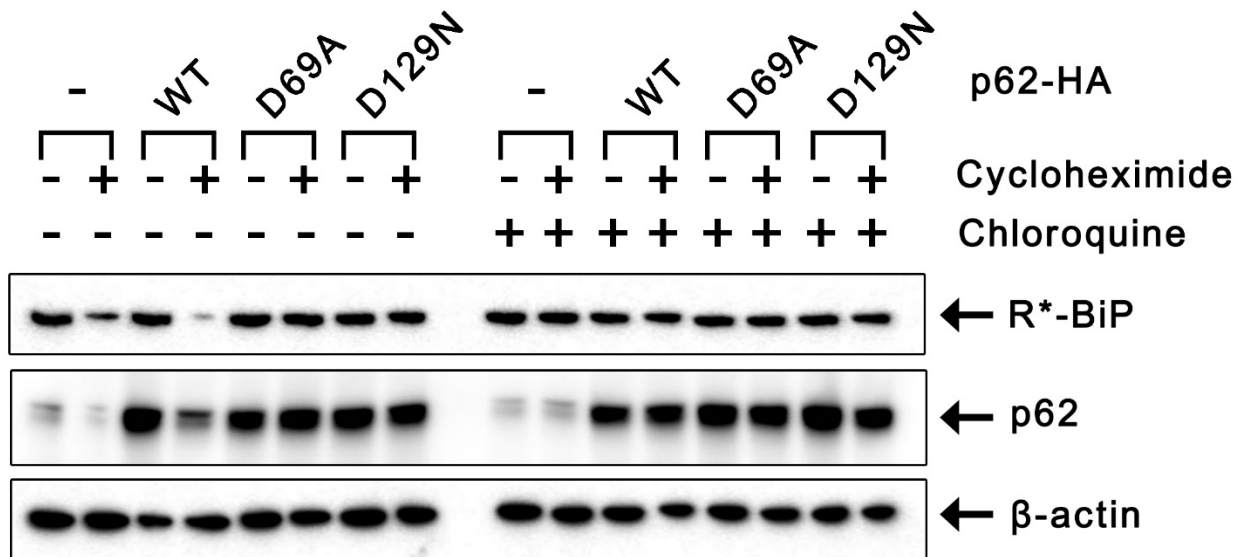

### Supplementary Figure 7. Degradation assay of R-BiP and p62 protein

Degradation assay of R-BiP generated from Ub-R-BiP using oligomerization defect D69A and N-degron recognition defect D129N mutant in HeLa cells in the absence of MG132, which showed the same results as shown in Figs. 2e and 3b. To visualize p62 co-degradation, the same experiments were performed with reduced amounts of p62-HA DNA (0.5  $\mu$ g) and prolonged treatment with 50  $\mu$ g/ml cycloheximide (16 hr). p62 WT underwent significant co-degradation with R-BiP protein, unlike the case with the D69A and D129N mutants. The degradation of R-BiP protein and p62 was blocked in presence of autophagy inhibitor, chloroquine (30  $\mu$ M, 16 hr).

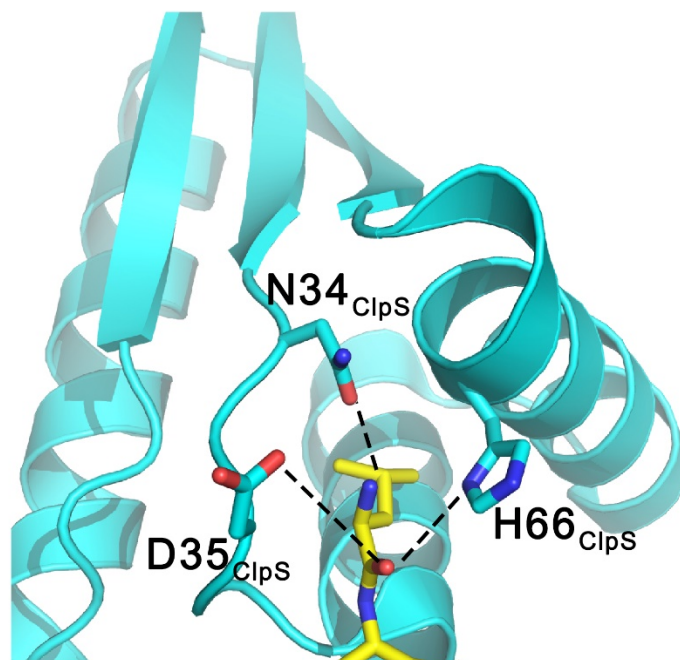

**Supplementary Figure 8. Recognition of type-2 N-degron by ClpS**

Ribbon diagram of ClpS from *E. coli* in complex with Leu-peptide substrate. The N-degron and key determinant residues in ClpS are shown as stick models. The hydrogen bonding interactions are indicated as black dashed lines. The  $\alpha$ -amino group of the N-degron is recognized by the side chain of Asn34 from ClpS.

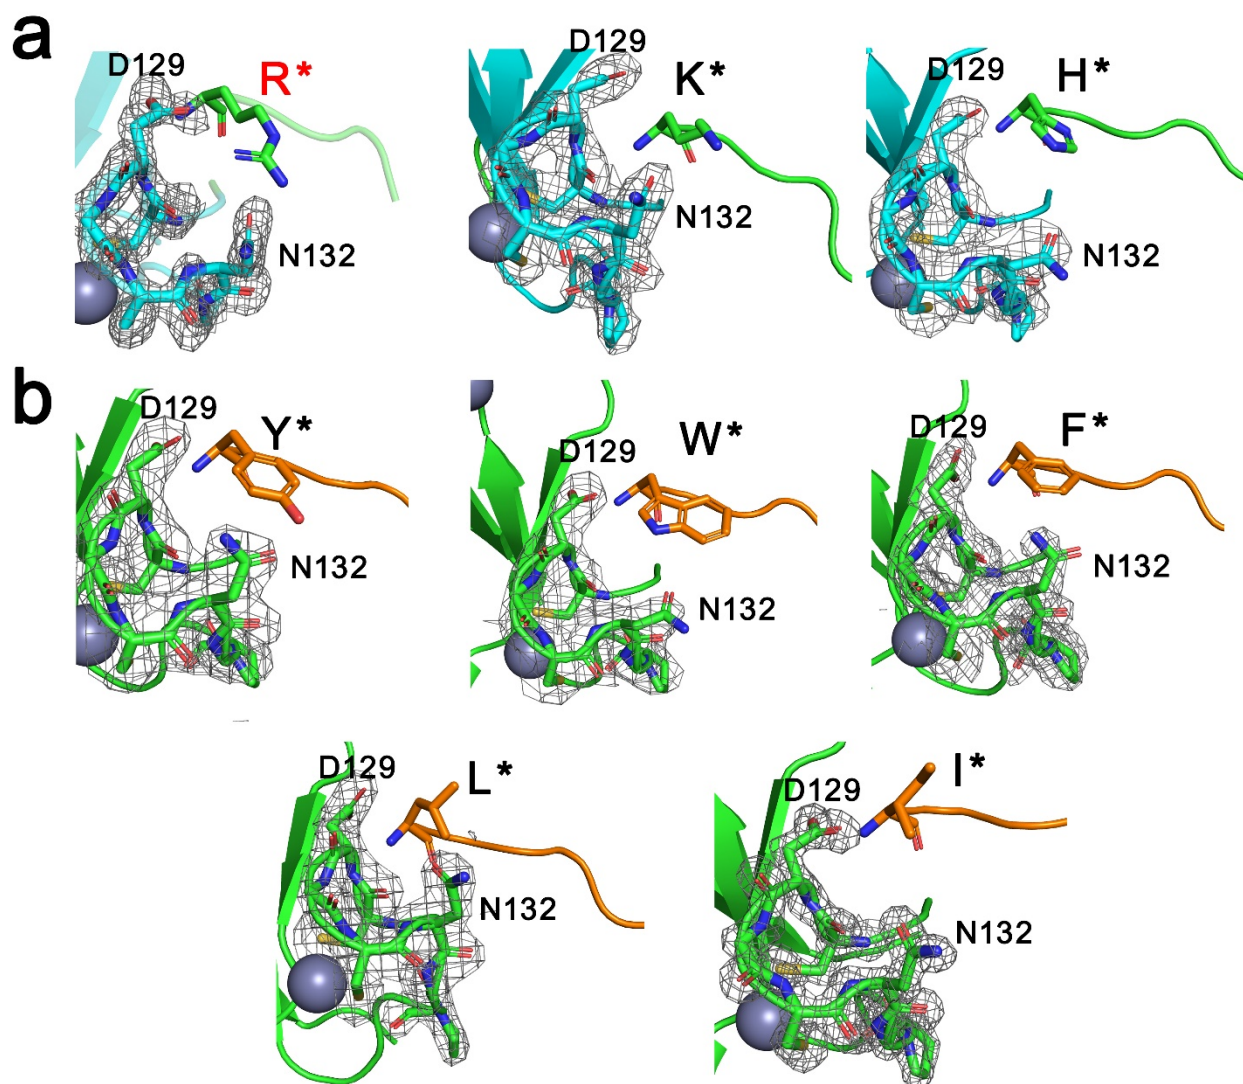

**Supplementary Figure 9. Electron density map around the N-degron recognition region in the ZZ-domain of p62**

(a) Electron density map of the ZZ-domain of p62 showing the recognition of type-1 N-degrons. The ZZ-domain and type-1 N-degrons are colored cyan and green, respectively. (b) Electron density map of the ZZ-domain of p62 showing the recognition of type-2 N-degrons. The ZZ-domain and N-degrons are colored green and dark orange, respectively. 2Fo-Fc electron density map contoured at  $1.2\sigma$  using the data ranging from 1.5 to 2.9 Å resolution. The bound peptide and key residues of p62 are shown as stick models and are labeled. Nitrogen and oxygen atoms are colored blue and red, respectively. The important Asn132 residue of p62 involved in the recognition of both type-1 and type-2 N-degron substrates shows clear electron density.

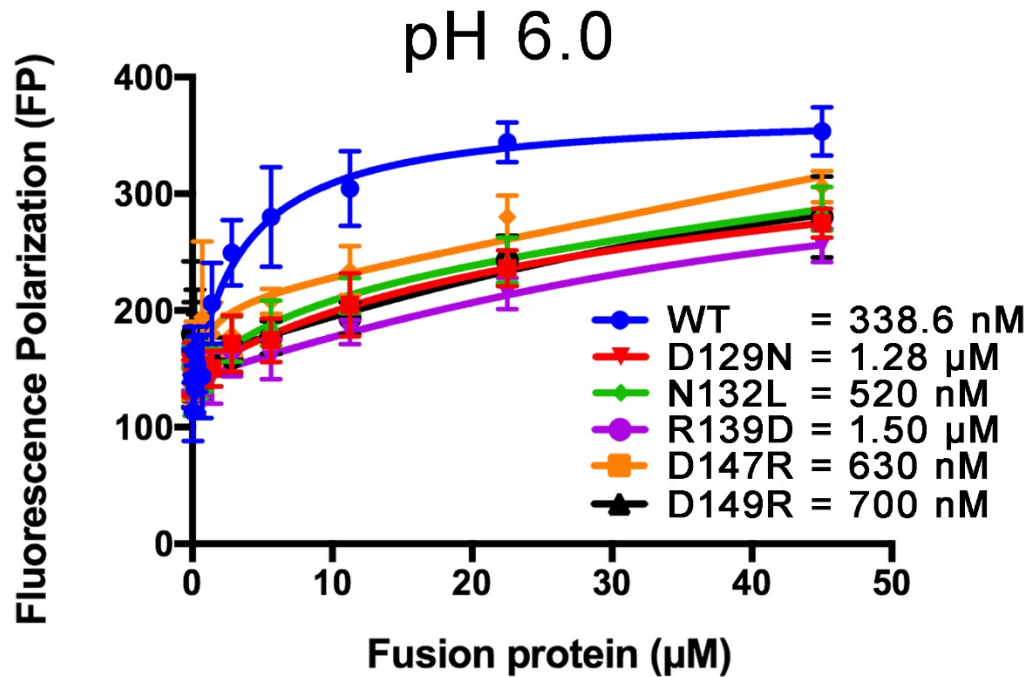

**Supplementary Figure 10. Mutational effects of key determinants on the recognition of N-degrons at low pH**

Binding affinity measurements using FITC-labeled R-BiP peptide against increasing concentrations of p62 mutants (MBP-PB1-ZZ WT – blue line, D129N – red line, N132L – green line, R139D – violet line, D147R – orange line and D149R – black line) at pH 6.0. The error bars represent standard error of the mean (S.E.M.) of more than three independent experiments.

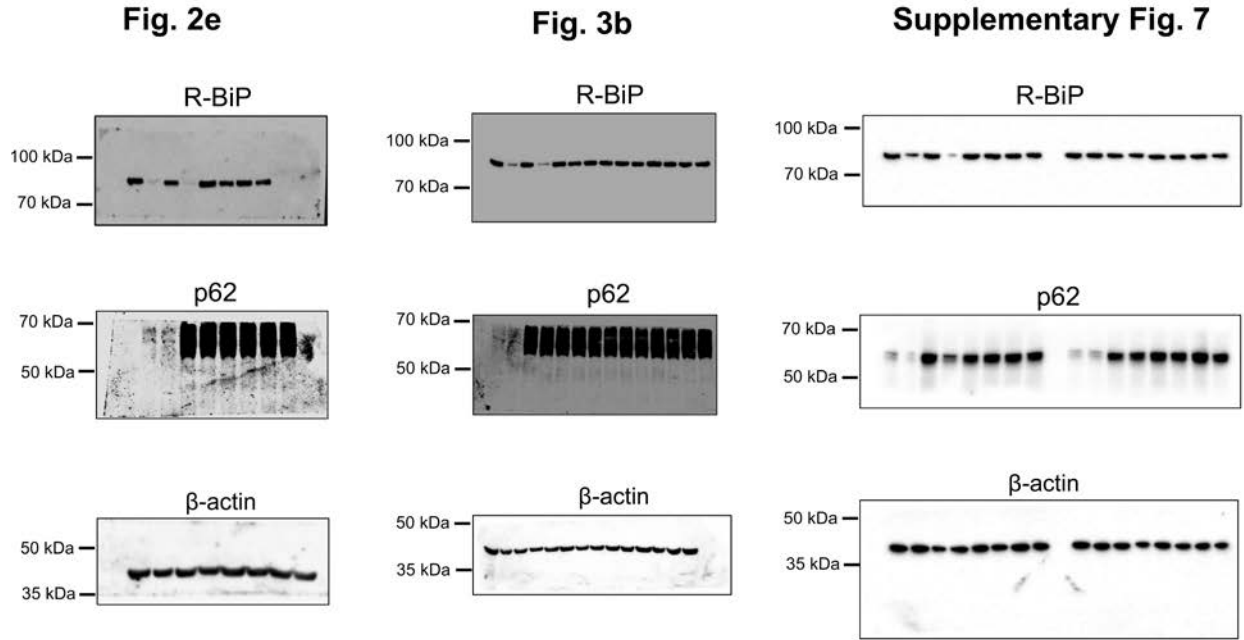

**Supplementary Figure 11. Uncropped images of Western blots**  
Related to Fig. 2e, Fig. 3b and Supplementary Fig. 7 as indicated.

**Supplementary Table 1. Data collection, phasing and refinement statistics of the ZZ-domain of p62**

| <b>Data collection</b>                                  | Apo                                      | REEED_Zn (Peak)                                       |
|---------------------------------------------------------|------------------------------------------|-------------------------------------------------------|
| Space group                                             | <i>P</i> 2 <sub>1</sub> 2 <sub>1</sub> 2 | <i>P</i> 2 <sub>1</sub> 2 <sub>1</sub> 2 <sub>1</sub> |
| Cell parameters                                         |                                          |                                                       |
| a, b, c (Å)                                             | 54.0, 43.3, 34.7                         | 29.0, 44.0, 66.6                                      |
| $\alpha$ , $\beta$ , $\gamma$ (°)                       | 90, 90, 90                               | 90, 90, 90                                            |
| Wavelength (Å)                                          | 0.90000                                  | 1.282282                                              |
| Resolution (Å) <sup>a</sup>                             | 33.8 - 1.42 (1.47 - 1.42)                | 50.0 - 1.77 (1.80 - 1.77)                             |
| <i>R</i> <sub>merge</sub>                               | 0.069 (0.824)                            | 0.066 (0.803)                                         |
| <i>I</i> / $\sigma$ ( <i>I</i> )                        | 41.9 (2.55)                              | 45.45 (2.97)                                          |
| Completeness (%)                                        | 99.0 (99.2)                              | 98.9 (95.7)                                           |
| Redundancy                                              | 5.9 (5.2)                                | 6.2 (5.9)                                             |
| <b>SAD-Phasing</b>                                      |                                          |                                                       |
| No. of Zn atoms                                         |                                          | 4                                                     |
| Initial figure of merit (FOM)                           |                                          | 0.35                                                  |
| FOM after density modification                          |                                          | 0.61                                                  |
| <b>Refinement</b>                                       |                                          |                                                       |
| Resolution (Å)                                          | 33.82 - 1.42 (1.47 - 1.42)               |                                                       |
| No. reflections                                         | 15,680 (1,509)                           |                                                       |
| <i>R</i> <sub>work</sub> / <i>R</i> <sub>free</sub> (%) | 18.8 / 20.9                              |                                                       |
| No. atoms                                               | 737                                      |                                                       |
| Protein                                                 | 648                                      |                                                       |
| Zn <sup>2+</sup> / Water                                | 4 / 85                                   |                                                       |
| B-factors (Å <sup>2</sup> )                             | 29.88                                    |                                                       |
| Protein                                                 | 28.40                                    |                                                       |
| Zn <sup>2+</sup> / Water                                | 21.16 / 41.60                            |                                                       |
| R.M.S deviations                                        |                                          |                                                       |
| Bond length (Å)                                         | 0.010                                    |                                                       |
| Bond angles (°)                                         | 1.32                                     |                                                       |
| Ramachandran statistics                                 |                                          |                                                       |
| Favored                                                 | 100                                      |                                                       |
| Allowed                                                 | 0                                        |                                                       |
| Outliers                                                | 0                                        |                                                       |
| <b>PDB ID</b>                                           | 5YP7                                     |                                                       |

<sup>a</sup> Values in parentheses are for highest-resolution shell.

**Supplementary Table 2. Data collection and refinement statistics of the ZZ-domain of p62 in complex with type-1 N-degrons**

| <b>Data collection</b>                                  | REEED                                              | KEEED                                              | HEEED                        |
|---------------------------------------------------------|----------------------------------------------------|----------------------------------------------------|------------------------------|
| Space group                                             | <i>P 2<sub>1</sub> 2<sub>1</sub> 2<sub>1</sub></i> | <i>P 2<sub>1</sub> 2<sub>1</sub> 2<sub>1</sub></i> | <i>I 2 3</i>                 |
| Cell dimensions                                         |                                                    |                                                    |                              |
| a, b, c (Å)                                             | 29.0, 44.0, 66.6                                   | 29.1, 43.8, 67.2                                   | 114.0, 114.0, 114.0          |
| $\alpha$ , $\beta$ , $\gamma$ (°)                       | 90, 90, 90                                         | 90, 90, 90                                         | 90, 90, 90                   |
| Wavelength (Å)                                          | 0.90000                                            | 1.2000                                             | 1.0000                       |
| Resolution (Å) <sup>a</sup>                             | 19.8 - 1.45<br>(1.5 - 1.45)                        | 21.9 - 2.50<br>(2.59 - 2.50)                       | 33.7 - 2.90<br>(2.95 - 2.90) |
| <i>R</i> <sub>merge</sub>                               | 0.061 (0.759)                                      | 0.168 (0.533)                                      | 0.110 (0.663)                |
| <i>I</i> / $\sigma$ ( <i>I</i> )                        | 49.5 (4.02)                                        | 13 (2.05)                                          | 31.4 (5.14)                  |
| Completeness (%)                                        | 97.3 (98.7)                                        | 96.1 (88.6)                                        | 99.89 (100.00)               |
| Redundancy                                              | 6.6 (6.6)                                          | 4.5 (3.2)                                          | 13.1 (13.4)                  |
| <b>Refinement</b>                                       |                                                    |                                                    |                              |
| Resolution (Å)                                          | 19.8 - 1.45<br>(1.5 - 1.45)                        | 21.91 - 2.50<br>(2.59 - 2.50)                      | 36.04 - 2.5<br>(2.59 - 2.5)  |
| No. reflections                                         | 15,274 (1,500)                                     | 2,939 (236)                                        | 8,701 (882)                  |
| <i>R</i> <sub>work</sub> / <i>R</i> <sub>free</sub> (%) | 16.1 / 19.6                                        | 23.9 / 26.7                                        | 25.2 / 29.4                  |
| No. atoms                                               | 858                                                | 792                                                | 1,416                        |
| Protein                                                 | 777                                                | 762                                                | 1,386                        |
| Zn <sup>2+</sup> / Water                                | 4 / 77                                             | 4 / 26                                             | 8 / 22                       |
| B-factors (Å <sup>2</sup> )                             | 34.28                                              | 35.68                                              | 54.56                        |
| Protein                                                 | 33.19                                              | 35.80                                              | 54.68                        |
| Zn <sup>2+</sup> / Water                                | 22.12 / 45.53                                      | 31.56 / 32.71                                      | 56.26 / 46.31                |
| R.M.S deviations                                        |                                                    |                                                    |                              |
| Bond length (Å)                                         | 0.011                                              | 0.007                                              | 0.006                        |
| Bond angles (°)                                         | 1.09                                               | 0.69                                               | 0.59                         |
| Ramachandran statistics                                 |                                                    |                                                    |                              |
| Favored                                                 | 98.99                                              | 97.96                                              | 95.51                        |
| Allowed                                                 | 1.01                                               | 1.02                                               | 4.49                         |
| Outliers                                                | 0                                                  | 1.02                                               | 0                            |
| <b>PDB ID</b>                                           | 5YP8                                               | 5YPA                                               | 5YPB                         |

<sup>a</sup> Values in parentheses are for highest-resolution shell.

**Supplementary Table 3. SAXS data collection and analysis**

| <b>Data collection parameters</b>                             |                      |                    |
|---------------------------------------------------------------|----------------------|--------------------|
| Instrument                                                    | PAL 4C1              |                    |
| Beam geometry                                                 | 20 mm slit           |                    |
| Wavelength (Å)                                                | 1.24                 |                    |
| $q$ range (Å <sup>-1</sup> )                                  | 0.001 ~ 0.2          |                    |
| Exposure time (second)                                        | 5                    |                    |
| Concentration range (mg ml <sup>-1</sup> )                    | 1.0 ~ 11.0           |                    |
| Temperature (K)                                               | 289                  |                    |
| <b>Structural parameters</b>                                  | Monomer <sup>a</sup> | Dimer <sup>b</sup> |
| $I(0)$ (cm <sup>-1</sup> ) [From $P(r)$ ]                     | 6.03                 | 15.43              |
| $R_g$ (Å) [From $P(r)$ ]                                      | 40.07                | 45.30              |
| $I(0)$ (cm <sup>-1</sup> ) [From Guinier]                     | 6.03                 | 15.43              |
| $R_g$ (Å) [From Guinier]                                      | 40.02                | 45.31              |
| $D_{\max}$ (Å)                                                | 132.73               | 149.55             |
| Porod volume estimate, $V_p$ (Å <sup>3</sup> )                | 66,700               | 156,000            |
| Dry volume calculated from monomer sequence                   | 76,731               | 76,731             |
| Molecular-mass determination                                  |                      |                    |
| Molecular mass $M_r$ [From Porod volume ( $V_p \cdot 0.66$ )] | 44.0 kDa             | 103.0 kDa          |
| Calculated monomeric $M_r$ from monomer sequence              | 63.4 kDa             | 63.4 kDa           |
| <b>Software employed</b>                                      |                      |                    |
| Primary data reduction                                        | In-house program     |                    |
| Data processing                                               | PRIMUS               |                    |
| <i>Ab initio</i> analysis                                     | DAMMIF               |                    |
| Validation and averaging                                      | DAMAVER              |                    |
| Rigid-body modeling                                           | Situs Program Suite  |                    |
| Computation of model intensities                              | Chimera              |                    |

<sup>a</sup> Monomeric species of MBP-PB1-ZZ D69A (2.5 mg/ml) at pH = 8.0.

<sup>b</sup> Dimeric species of MBP-PB1-ZZ D69A (5.0 mg/ml) at pH = 8.0.



**Supplementary Table 4. Data collection and refinement statistics of the ZZ-domain of p62 in complex with type-2 N-degrons**

| <b>Data collection</b>                    | <b>FEEED</b>                 | <b>YEEED</b>                 | <b>WEEED</b>                 | <b>LEEED</b>                                       | <b>IEEED</b>                 |
|-------------------------------------------|------------------------------|------------------------------|------------------------------|----------------------------------------------------|------------------------------|
| Space group                               | <i>C 1 2 1</i>               | <i>I 2 3</i>                 | <i>I 2 3</i>                 | <i>P 2<sub>1</sub> 2<sub>1</sub> 2<sub>1</sub></i> | <i>P 1 2<sub>1</sub> 1</i>   |
| Cell dimensions                           |                              |                              |                              |                                                    |                              |
| a, b, c (Å)                               | 34.7, 43.3, 54.0             | 114.5, 114.5, 114.5          | 115.0, 115.0, 115.0          | 28.5, 44.3, 68.2                                   | 33.7, 33.4, 35.0             |
| $\alpha, \beta, \gamma$ (°)               | 94.81, 46.29, 54.88          | 90, 90, 90                   | 90, 90, 90                   | 90, 90, 90                                         | 90, 103.61, 90               |
| Wavelength (Å)                            | 0.90000                      | 1.0000                       | 0.90000                      | 1.0000                                             | 1.20000                      |
| Resolution (Å) <sup>a</sup>               | 31.4 - 1.96<br>(2.03 - 1.96) | 36.2 - 2.85<br>(2.95 - 2.85) | 40.7 - 2.95<br>(3.05 - 2.95) | 27.0 - 2.20<br>(2.27 - 2.20)                       | 17.9 - 1.62<br>(1.68 - 1.62) |
| R <sub>merge</sub>                        | 0.082 (0.559)                | 0.183 (0.804)                | 0.082 (0.816)                | 0.115 (0.534)                                      | 0.040 (0.165)                |
| <i>I</i> / $\sigma$ ( <i>I</i> )          | 24.6 (1.68)                  | 20.5 (3.00)                  | 50.0 (4.45)                  | 25.3 (4.67)                                        | 34.7 (7.78)                  |
| Completeness (%)                          | 93.5 (79.0)                  | 100 (100)                    | 99.9 (100)                   | 98.3 (99.1)                                        | 94 (86.8)                    |
| Redundancy                                | 3.2 (2.8)                    | 11.4 (10.9)                  | 10.6 (10.9)                  | 5.2 (5.4)                                          | 3.3 (2.9)                    |
| <b>Refinement</b>                         |                              |                              |                              |                                                    |                              |
| Resolution (Å)                            | 31.4 - 1.96<br>(2.03 - 1.96) | 36.2 - 2.85<br>(2.95 - 2.85) | 40.7 - 2.95<br>(3.05 - 2.95) | 27.0 - 2.20<br>(2.27 - 2.20)                       | 17.9 - 1.63<br>(1.68 - 1.62) |
| No. reflections                           | 15,737 (1,527)               | 5,991 (596)                  | 5,455 (543)                  | 4,633 (429)                                        | 9,010 (835)                  |
| R <sub>work</sub> / R <sub>free</sub> (%) | 20.2 / 23.0                  | 23.6 / 27.4                  | 22.6 / 26.1                  | 25.5 / 28.5                                        | 14.5 / 18.1                  |
| No. atoms                                 | 1,584                        | 1,420                        | 1,429                        | 774                                                | 868                          |
| Protein                                   | 1,513                        | 1,412                        | 1,421                        | 760                                                | 747                          |
| Zn <sup>2+</sup> / Water                  | 8 / 63                       | 8 / -                        | 8 / -                        | 4 / 10                                             | 4 / 117                      |
| B-factors (Å <sup>2</sup> )               | 43.39                        | 44.85                        | 71.21                        | 41.44                                              | 15.45                        |
| Protein                                   | 43.30                        | 44.87                        | 71.22                        | 41.44                                              | 13.80                        |
| Zn <sup>2+</sup> / Water                  | 37.24 / 46.25                | 42.23 / -                    | 69.2 / -                     | 39.21 / 42.92                                      | 12.26 / 23.72                |
| R.M.S deviations                          |                              |                              |                              |                                                    |                              |
| Bond length (Å)                           | 0.005                        | 0.003                        | 0.004                        | 0.002                                              | 0.017                        |
| Bond angles (°)                           | 0.89                         | 0.58                         | 0.71                         | 0.61                                               | 1.64                         |
| Ramachandran statistics                   |                              |                              |                              |                                                    |                              |
| Favored                                   | 96.34                        | 92.78                        | 93.37                        | 96.94                                              | 96.88                        |
| Allowed                                   | 3.66                         | 7.22                         | 6.63                         | 3.06                                               | 3.12                         |
| Outliers                                  | 0                            | 0                            | 0                            | 0                                                  | 0                            |
| <b>PDB ID</b>                             | <b>5YPC</b>                  | <b>5YPE</b>                  | <b>5YPF</b>                  | <b>5YPG</b>                                        | <b>5YPH</b>                  |

<sup>a</sup> Values in parentheses are for highest-resolution shell.

**Supplementary Table 5. Primers used in this study**

| <b>Primer</b>         | <b>Sequence</b>                                                                     | <b>Usage</b>                            |
|-----------------------|-------------------------------------------------------------------------------------|-----------------------------------------|
| hSqstm1 BgIII F       | cagg <b>aga tct</b> atg gcg tcg ctc acc gtg aag                                     | Full-length gene cloning                |
| hSqstm1 EcoRI R       | ctgt <b>gaa ttc</b> tca caa cgg cgg ggg atg ctt                                     | Full-length gene cloning                |
| hSqstm1 Nd126 F       | ctg gtt ccg <b>aga tct</b> atc tgc gat ggc tgc                                      | N-terminus deletion (1-126)             |
| hSqstm1 Nd126 R       | gca gcc atc gca gat <b>aga tct</b> cgg aac cag                                      | N-terminus deletion (1-126)             |
| hSqstm1 K7A F         | gcg tcg ctc acc gtg <b>gcg</b> gcc tac ctt ctg ggc                                  | Lys 7 to Ala 7 mutation                 |
| hSqstm1 K7A R         | gcc cag aag gta ggc <b>cgc</b> cac ggt gag cga cgc                                  | Lys 7 to Ala 7 mutation                 |
| hSqstm1 D69A F        | cag gcg cac tac cgc <b>gct</b> gag gac ggg gac ttg                                  | Asp 69 to Ala 69 mutation               |
| hSqstm1 D69A R        | caa gtc ccc gtc ctc <b>agc</b> gcg gta gtg cgc ctg                                  | Asp 69 to Ala 69 mutation               |
| hSqstm1 BamHI 128 F   | aat <b>gga tcc</b> tgc gat ggc tgc aat ggg cct gtg                                  | crystallization construct gene          |
| hSqstm1 EcoRI F       | cttg <b>gaa ttc</b> atg gcg tcg ctc acc gtg aag                                     | Full-length gene cloning                |
| hSqstm1 XhoI R        | gtg ctc gag tca caa cgg cgg ggg atg ctt                                             | Full-length gene cloning                |
| hSqstm1 EcoRI F       | att gaa ttc <b>atg</b> gcg tcg ctc acc gtg aag                                      | Full-length gene cloning                |
| LC3B BamHI F          | ccg <b>gga tcc</b> atg ccg tcg gag aag acc ttc aag                                  | LC3B fuson construct generating         |
| hSqstm1 172 XhoI R    | ata <b>ctc gag</b> cta gaa ggg gct ggg gaa tgc ga                                   | crystallization construct gene          |
| hSqstm1 FEEED F       | AG GAC ACG TTC GGG TTT GAA GAA GAA GA                                               | Linker sequence R -> F                  |
| hSqstm1 FEEED R       | TC TTC TTC TTC AAA CCC GAA CGT GTC CT                                               | Linker sequence R -> F                  |
| hSqstm1 WEEED F       | AG GAC ACG TTC GGG TGG GAA GAA GAA GA                                               | Linker sequence R -> W                  |
| hSqstm1 WEEED R       | TC TTC TTC TTC CCA CCC GAA CGT GTC CT                                               | Linker sequence R -> W                  |
| hSqstm1 N-term Flag F | gcc tcc cag gac acg ttc ggg gat tat aaa gat gat gat aaa gtg atc tgc gat ggc tgc aat | Linker sequence change to flag sequence |
| hSqstm1 N-term Flag R | attgcagccatcgcagatcactttatcatcatctttataatccccgaacgtgtcctggaggcc                     | Linker sequence change to flag sequence |
| hSqstm1 LEEED F       | AG GAC ACG TTC GGG TTG GAA GAA GAA GA                                               | Linker sequence R -> L                  |
| hSqstm1 LEEED R       | TC TTC TTC TTC CAA CCC GAA CGT GTC CT                                               | Linker sequence R -> L                  |
| hSqstm1 IEEED F       | AG GAC ACG TTC GGG ATT GAA GAA GAA GA                                               | Linker sequence R -> I                  |
| hSqstm1 IEEED R       | TC TTC TTC TTC AAT CCC GAA CGT GTC CT                                               | Linker sequence R -> I                  |
| hSqstm1 YEEED F       | AG GAC ACG TTC GGG TAT GAA GAA GAA GA                                               | Linker sequence R -> Y                  |

|                           |                                                                         |                               |
|---------------------------|-------------------------------------------------------------------------|-------------------------------|
| hSqstm1 YEEED R           | TC TTC TTC TTC ATA CCC GAA CGT GTC CT                                   | Linker sequence R -> Y        |
| hSqstm1 HEEED F           | AG GAC ACG TTC GGG CAT GAA GAA GAA GA                                   | Linker sequence R -> H        |
| hSqstm1 HEEED R           | TC TTC TTC TTC ATG CCC GAA CGT GTC CT                                   | Linker sequence R -> H        |
| hSQSTM1 I126A F           | TAT TTT CAG GGA TCT gct TGC GAT GGC TGC AAT                             | Ile 126 to Ala 126 mutation   |
| hSQSTM1 I126A R           | ATT GCA GCC ATC GCA agc AGA TCC CTG AAA ATA                             | Ile 126 to Ala 126 mutation   |
| hSqstm1 D129R F           | GGA TCT GCT TGC cgt GGC TGC AAT GGG                                     | Asp 129 to Arg 129 mutation   |
| hSqstm1 D129R R           | CCC ATT GCA GCC acg GCA AGC AGA TCC                                     | Asp 129 to Arg 129 mutation   |
| hSqstm1 R139D F           | GTG GTA GGA ACC gac TAC AAG TGC AGC                                     | Arg 139 to Asp 139 mutation   |
| hSqstm1 R139D R           | GCT GCA CTT GTA gtc GGT TCC TAC CAC                                     | Arg 139 to Asp 139 mutation   |
| hSqstm1 D147R F           | AGC GTC TGC CCA cgt TAC GAC TTG TGT                                     | Asp 147 to Arg 147 mutation   |
| hSqstm1 D147R R           | ACA CAA GTC GTA acg TGG GCA GAC GCT                                     | Asp 147 to Arg 147 mutation   |
| hSqstm1 D149R F           | TGC CCA GAC TAC cgt TTG TGT AGC GTC                                     | Asp 149 to Arg 149 mutation   |
| hSqstm1 D149R R           | GACGCTACACAAacgGTAGTCTGGGCA                                             | Asp 149 to Arg 149 mutation   |
| hSqstm1 KEEED F           | AG GAC ACG TTC GGG AAA GAA GAA GAA GA                                   | Linker sequence R -> K        |
| hSqstm1 KEEED R           | TC TTC TTC TTC TTT CCC GAA CGT GTC CT                                   | Linker sequence R -> K        |
| hSqstm1 D129N F           | AAT GTG ATC TGC AAC GGC TGC AAT GGG                                     | Asp 129 to Asn 129 mutation   |
| hSqstm1 D129N R           | CCC ATT GCA GCC GTT GCA GAT CAC ATT                                     | Asp 129 to Asn 129 mutation   |
| hSqstm1 PEEED F           | AG GAC ACG TTC GGG CCG GAA GAA GAA GA                                   | Linker sequence R -> P        |
| hSqstm1 PEEED R           | TC TTC TTC TTC CGG CCC GAA CGT GTC CT                                   | Linker sequence R -> P        |
| hSqstm1 GEEED F           | AG GAC ACG TTC GGG GGC GAA GAA GAA GA                                   | Linker sequence R -> G        |
| hSqstm1 GEEED R           | TC TTC TTC TTC GCC CCC GAA CGT GTC CT                                   | Linker sequence R -> G        |
| Ub BamHI F                | tca gga tcc atg cag atc ttc gtg aag act ctg act                         | UB-R-BiP gene cloning         |
| UB_R-Bip B R              | ctt gtc ctc ctc ctc gcg ccc acc tct gag acg gag tac                     | UB-R-BiP gene cloning         |
| UB_B-Bip C F              | ctc cgt ctc aga ggt ggg cgc gag gag gag gac aag                         | UB-R-BiP gene cloning         |
| R-Bip HindIII R (ns)      | aat aag ctt caa ctc atc ttt ttc tgc tgt atc ctc ttc                     | UB-R-BiP gene cloning         |
| LC3B_REEED_hSqstm1 S3 B_R | cac ggt gag cga atc ttc ttc ttc acg ccc gaa cgt ctc ctg gga ggc ata gac | LC3B_REEED_hSqstm1 generating |
| LC3B_REEED_hSqstm1 S3 C_F | gag acg ttc ggg cgt gaa gaa gaa gat tcg ctc acc gtg aag gcc tac ctt     | LC3B_REEED_hSqstm1 generating |

|                      |                                                       |                                     |
|----------------------|-------------------------------------------------------|-------------------------------------|
| Sqstm1 N132L F       | tgc gat ggc tgc ctt ggg cct gtg gta                   | Asn 132 to Leu 132 mutation         |
| Sqstm1 N132L R       | taccacaggcccaaggcagccatcgca                           | Asn 132 to Leu 132 mutation         |
| Sqstm1 XhoI F        | acg <b>ctc gag</b> atg gcg tcg ctc acc gtg aag gcc    | Full-length gene cloning            |
| Sqstm1 HindIII R     | agc <b>aag ctt</b> caa cgg cgg ggg atg ctt tga ata    | Full-length gene cloning            |
| Sqstm1 Sall F        | acg <b>gtc acg</b> atg gcg tcg ctc acc gtg aag gcc    | Full-length gene cloning            |
| Sqstm1 AgeI R        | ctc <b>acc ggt</b> caa cgg cgg ggg atg ctt tga ata    | Full-length gene cloning            |
| Ub-R19 BiP HindIII F | acc <b>aag ctt</b> atg cag atc ttc gtg aag act cgt    | UB-R19-BiP gene cloning             |
| Ub-R19 BiP PstI R    | agt <b>ctg cag</b> caa ctc atc ttt ttc cgt atc ctc    | UB-R19-BiP gene cloning             |
| Ub-R19 BiP PstI+1 F  | tcc <b>ctg cag</b> a atg cag atc ttc gtg aag act cgt  | UB-R19-BiP gene cloning             |
| Ub-R19 BiP BamHI+2 R | agt <b>gga tcc</b> at caa ctc atc ttt ttc cgt atc ctc | UB-R19-BiP gene cloning             |
| Ub-R19 BiP SacII R   | agt <b>ccg cgg</b> caa ctc atc ttt ttc cgt atc ctc    | UB-R19-BiP gene cloning             |
| hSqstm1 H66A F       | ggc ttc cag gcg <b>gcc</b> tac cgc gat gag            | His 66 to Ala 66 mutation           |
| hSqstm1 H66A R       | ctc atc gcg gta <b>ggc</b> cgc ctg gaa gcc            | His 66 to Ala 66 mutation           |
| hSqstm1 H109A F      | tgc cgg cgg gac <b>gca</b> cgc cca ccg tgt            | His 109 to Ala 109 mutation         |
| hSqstm1 H109A R      | aca cgg tgg gcg <b>tgc</b> gtc ccg ccg gca            | His 109 to Ala 109 mutation         |
| Sqstm1 C113A F       | c cac cgc cca ccg <b>gct</b> gct cag gag gcg c        | Cys 113 to Ala 113 mutation         |
| Sqstm1 C113A R       | g cgc ctc ctg agc <b>agc</b> cgg tgg gcg gtg g        | Cys 113 to Ala 113 mutation         |
| hSqstm1 N 103 F      | att aaa gag aaa aaa <b>tag</b> tgc cgg cgg gac        | C-terminal deletion N103 generating |
| hSqstm1 N 103 R      | gtc ccg ccg gca <b>cta</b> ttt ttt ctc ttt aat        | C-terminal deletion N103 generating |
| hSqstm1 N121 F       | ccc cgc aac atg <b>tag</b> cac ccc aat gtg            | C-terminal deletion N121 generating |
| hSqstm1 N121 R       | cac att ggg gtg <b>cta</b> cat gtt gcg ggg            | C-terminal deletion N121 generating |
| hSqstm1 R21A F       | gcg cgc gag att <b>gcc</b> cgc ttc agc ttc            | Arg 21 to Ala 21 mutation           |
| hSqstm1 R21A R       | gaa gct gaa gcg <b>ggc</b> aat ctc gcg cgc            | Arg 21 to Ala 21 mutation           |
| hSqstm1 R22A F       | cgc gag att cgc <b>gcc</b> ttc agc ttc tgc            | Arg 22 to Ala 22 mutation           |
| hSqstm1 R22A R       | gca gaa gct gaa <b>ggc</b> gcg aat ctc gcg            | Arg 21 to Ala 21 mutation           |
| hSqstm1 E81A F       | ttt tcc agt gac <b>gcg</b> gaa ttg aca atg            | Glu 81 to Ala 81 mutation           |
| hSqstm1 E81A R       | cat tgt caa ttc cgc gtc act gga aaa                   | Glu 81 to Ala 81 mutation           |

|                |                                            |                                     |
|----------------|--------------------------------------------|-------------------------------------|
| hSqstm1 E82A F | tcc agt gac gag <b>gca</b> ttg aca atg gcc | Glu 82 to Ala 82 mutation           |
| hSqstm1 E82A R | ggc cat tgt caa <b>tgc</b> ctc gtc act gga | Glu 82 to Ala 82 mutation           |
| hSqstm1 N172 F | ctc gca ttc ccc <b>tag</b> ccc ttc ggg cac | C-terminal deletion N172 generating |
| hSqstm1 N172 R | gtg ccc gaa ggg <b>cta</b> ggg gaa tgc gag | C-terminal deletion N172 generating |
